# Supplementary material for: Identifying positively deviant elderly medical wards using routinely collected NHS Safety Thermometer data: an observational study
Source: PubMed Central journal article supplement — BMJ Open. 2018 Feb 16;8(2):e020219. doi: 10.1136/bmjopen-2017-020219 (PMC5829907; doi:10.1136/bmjopen-2017-020219), 2018-02-16
Supplement: bmjopen-2017-020219supp003.pdf [file bmjopen-2017-020219supp003.pdf]

### Supplementary file 3

#### Key characteristics of the positively deviant and comparison wards

|                                 | Ward | ST Harm-free care (%) | Trust number / type             | Patient gender <sup>a</sup> | Index of Multiple Deprivation <sup>b</sup> |
|---------------------------------|------|-----------------------|---------------------------------|-----------------------------|--------------------------------------------|
| <b>Positively deviant wards</b> | 1    | 90.14                 | Trust 1 / Teaching & Foundation | Mixed                       | More deprived 40-50%                       |
|                                 | 3    | 92.68                 | Trust 2 / Teaching              | Female                      | More deprived 30-40%                       |
|                                 | 6    | 91.48                 | Trust 2 / Teaching              | Female                      | More deprived 30-40%                       |
|                                 | 7    | 91.40                 | Trust 3 / Teaching & Foundation | Mixed                       | Less deprived 30-40%                       |
|                                 | 10   | 90.97                 | Trust 5 / Foundation            | Mixed                       | More deprived 30-40%                       |
| <b>Comparison wards</b>         | 2    | 88.48                 | Trust 1 / Teaching & Foundation | Mixed                       | More deprived 40-50%                       |
|                                 | 4    | 87.72                 | Trust 2 / Teaching              | Female                      | More deprived 30-40%                       |
|                                 | 5    | 85.17                 | Trust 2 / Teaching              | Male                        | More deprived 30-40%                       |
|                                 | 8    | 87.90                 | Trust 3 / Teaching & Foundation | Mixed                       | Less deprived 30-40%                       |
|                                 | 9    | 88.01                 | Trust 4 / Foundation            | Mixed                       | More deprived 30-40%                       |

<sup>a</sup> One positively deviant ward had to be matched to a comparison ward that cared for patients of the opposite gender.

<sup>b</sup> IMD overall rank data (extracted from the 2012/13 Hospital Episode Statistics data) are categorised into deciles. Geographic areas are ranked and then described as falling within the most or least deprived % of England. Categories change in increments of 10% up to the more/least deprived 40-50% of England.
