# Supplementary material for: Identifying positively deviant elderly medical wards using routinely collected NHS Safety Thermometer data: an observational study
Source: PubMed Central journal article supplement — BMJ Open. 2018 Feb 16;8(2):e020219. doi: 10.1136/bmjopen-2017-020219 (PMC5829907; doi:10.1136/bmjopen-2017-020219), 2018-02-16

Supplementary file 5

Scatterplot of z-scores to assess whether other perceptions of safety support the use of ST data to identify positive deviants.

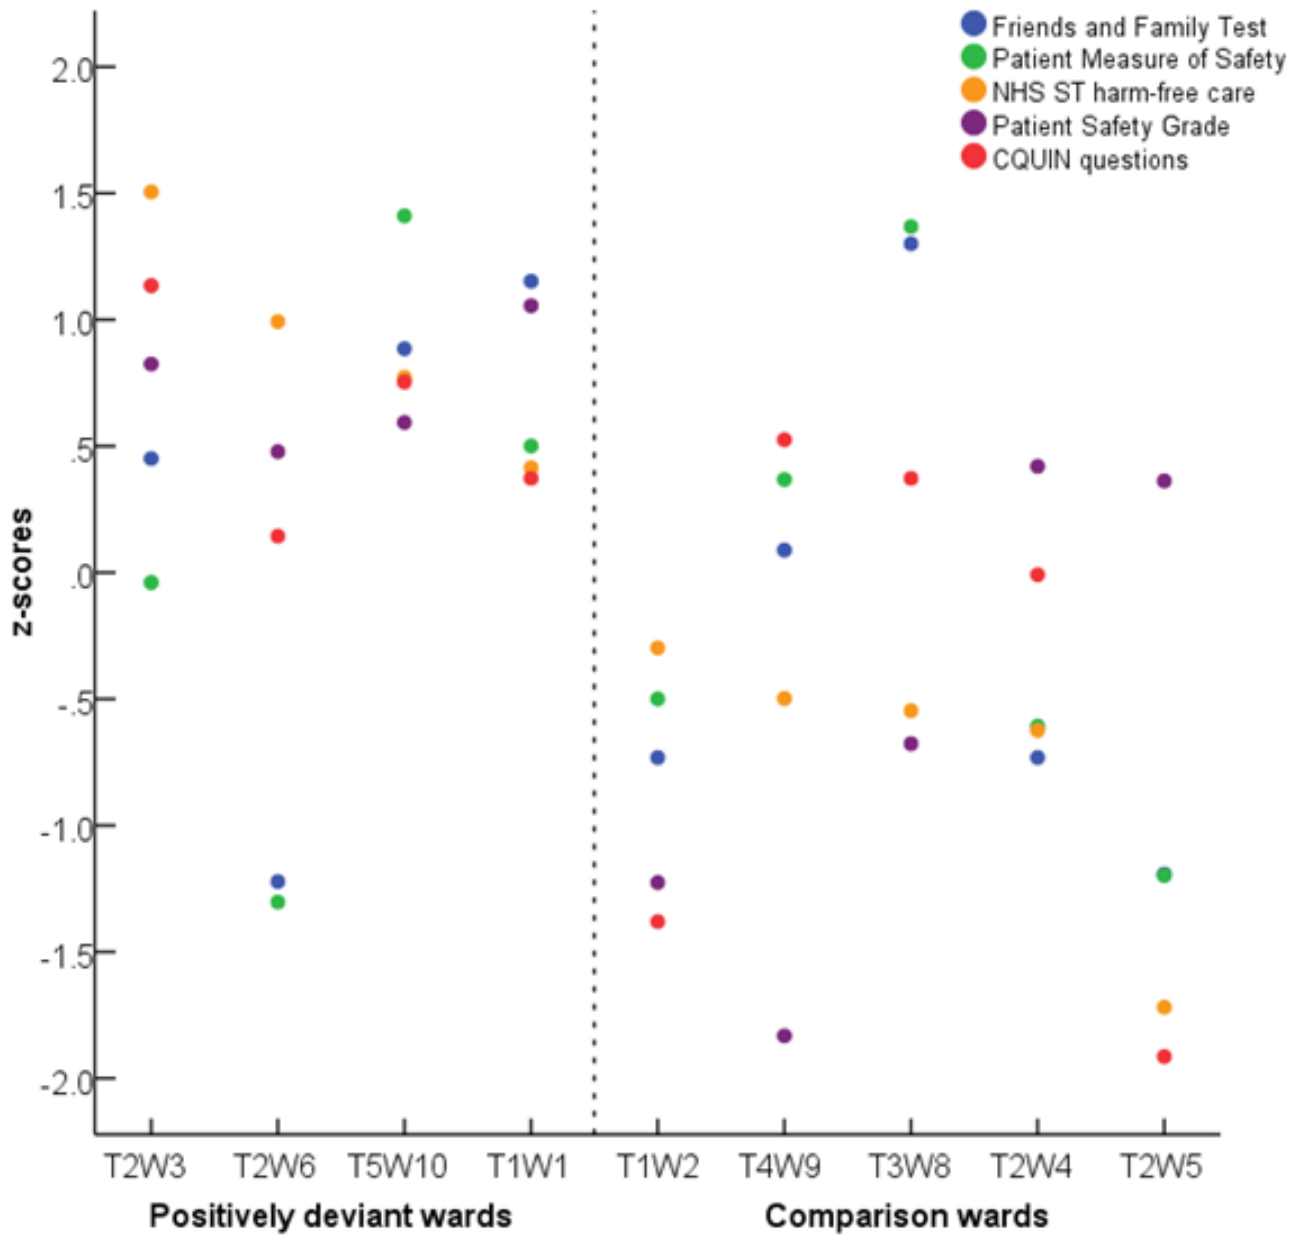

Supplement: bmjopen-2017-020219supp005.pdf [file bmjopen-2017-020219supp005.pdf]
